# Supplementary material
Source: MDPI journal article supplement (https://www.mdpi.com/2504-3900/8/1/39)

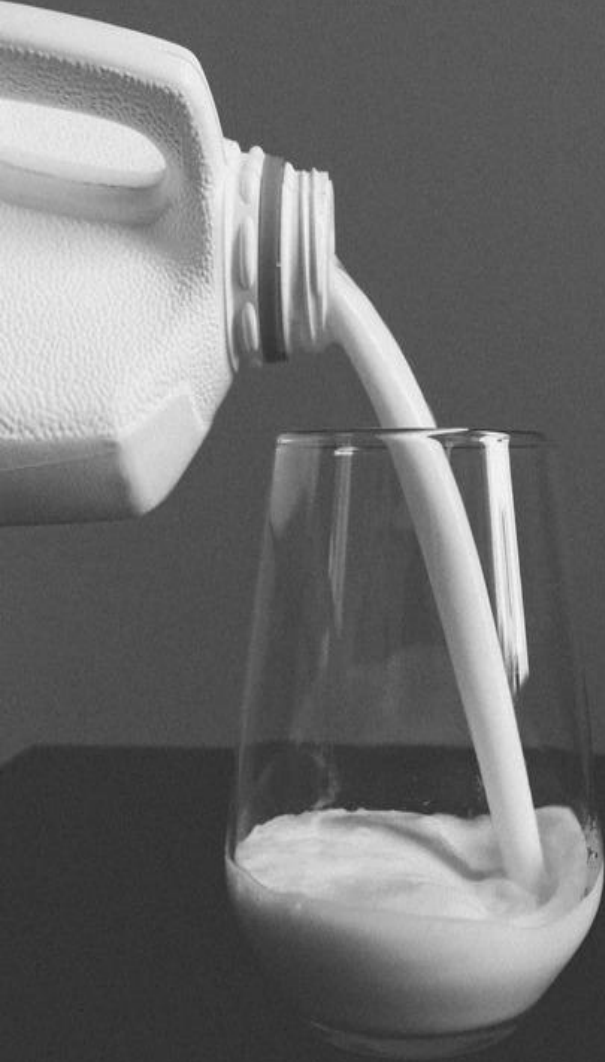

# **DO LACTOSE INTOLERANT INDIVIDUALS EFFICIENTLY ABSORB PROTEIN FROM ACUTE MILK CONSUMPTION?**

**UTPAL KUMAR PRODHAN**

PhD Student

Liggins Institute

University of Auckland

Someone added  
milk to my coffee.

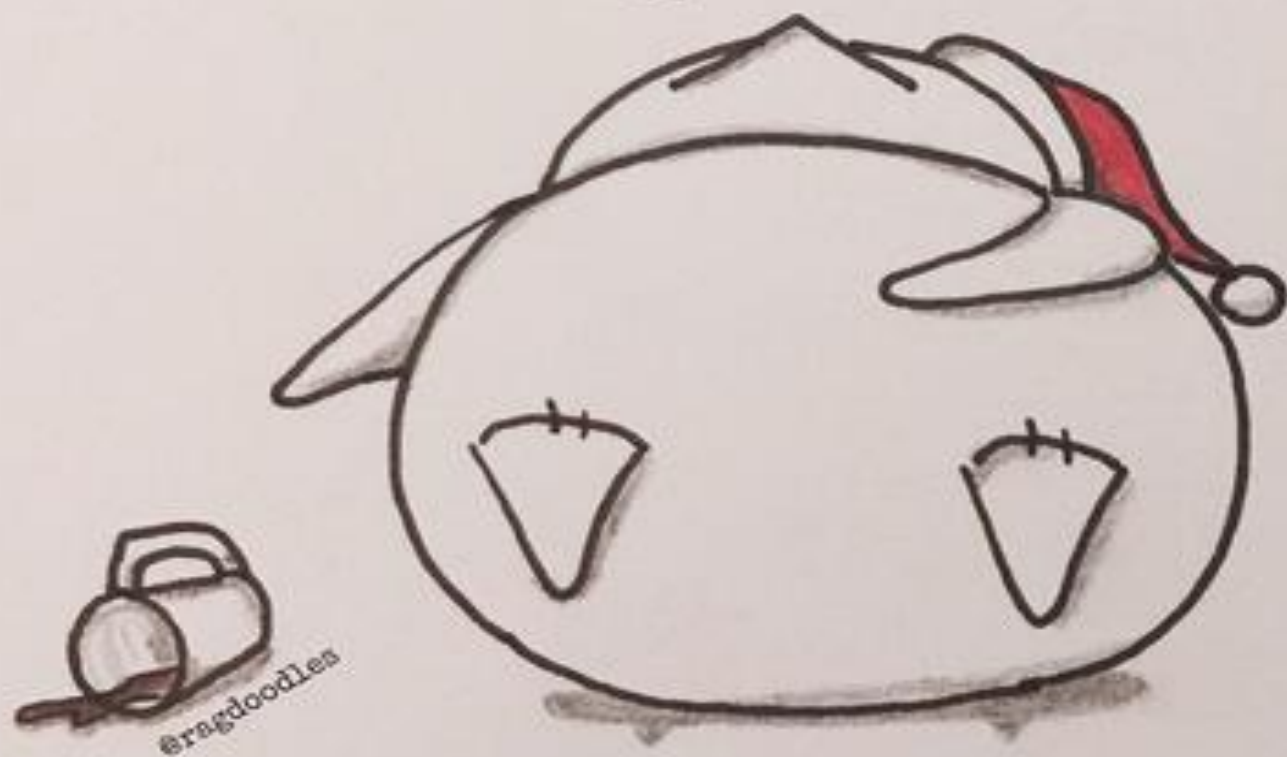

'Lactose Intolerance'

# What happens when you drink milk?

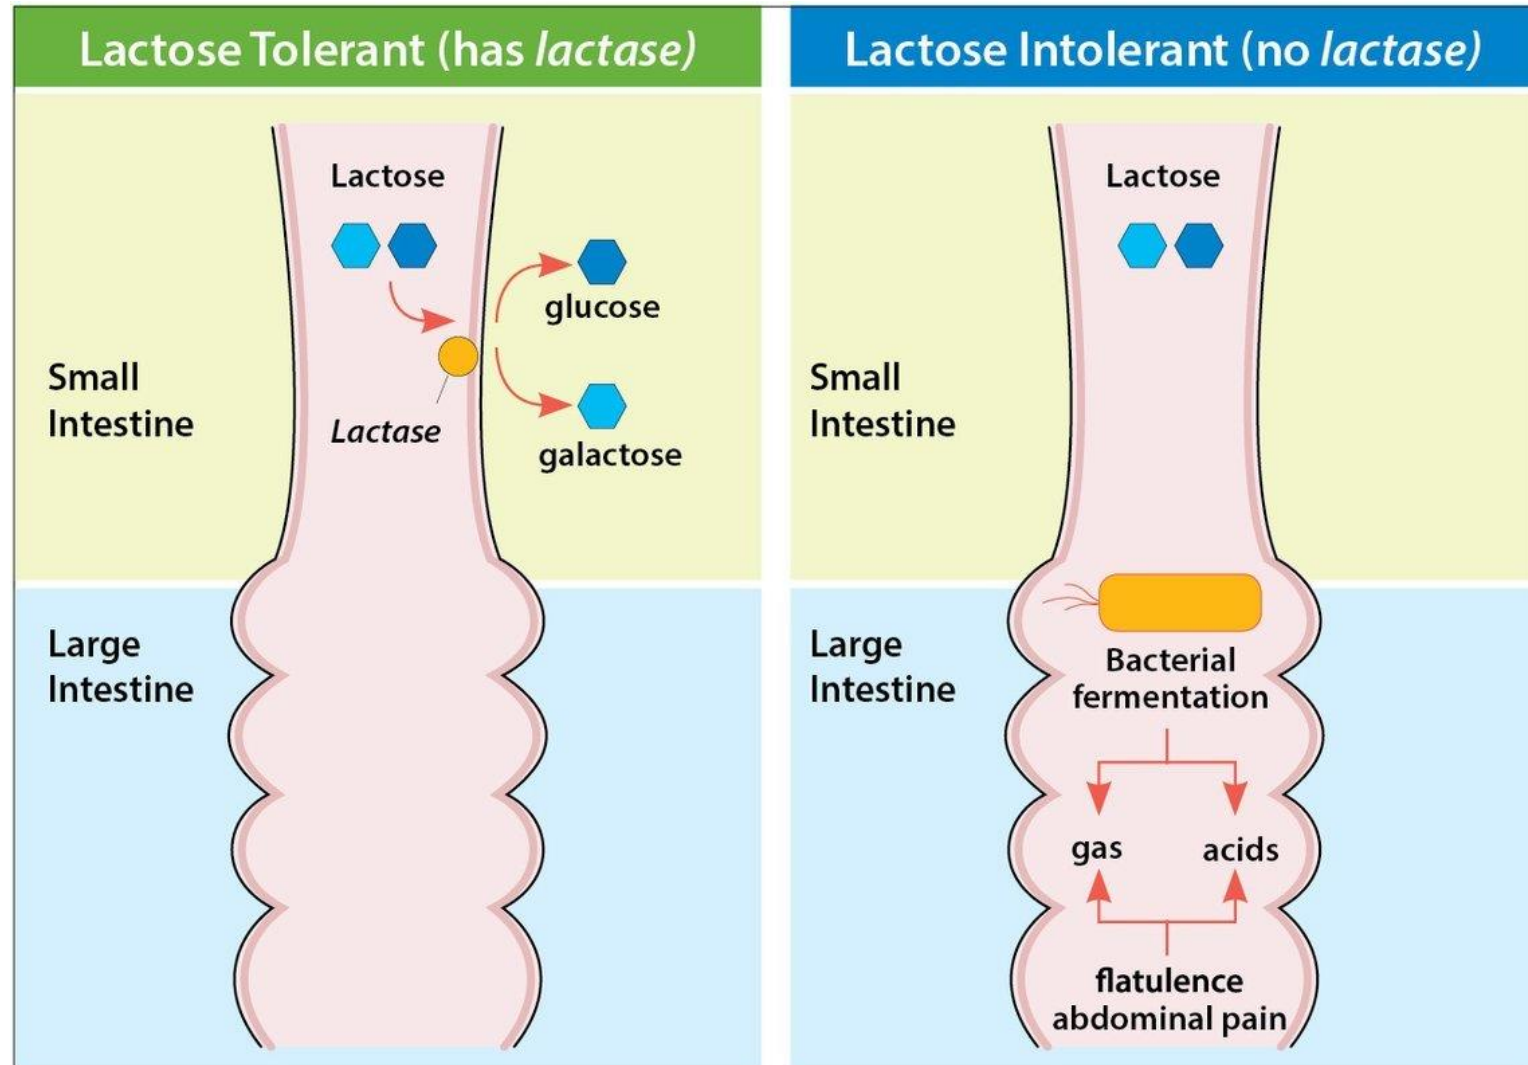

# What happens when you drink milk?

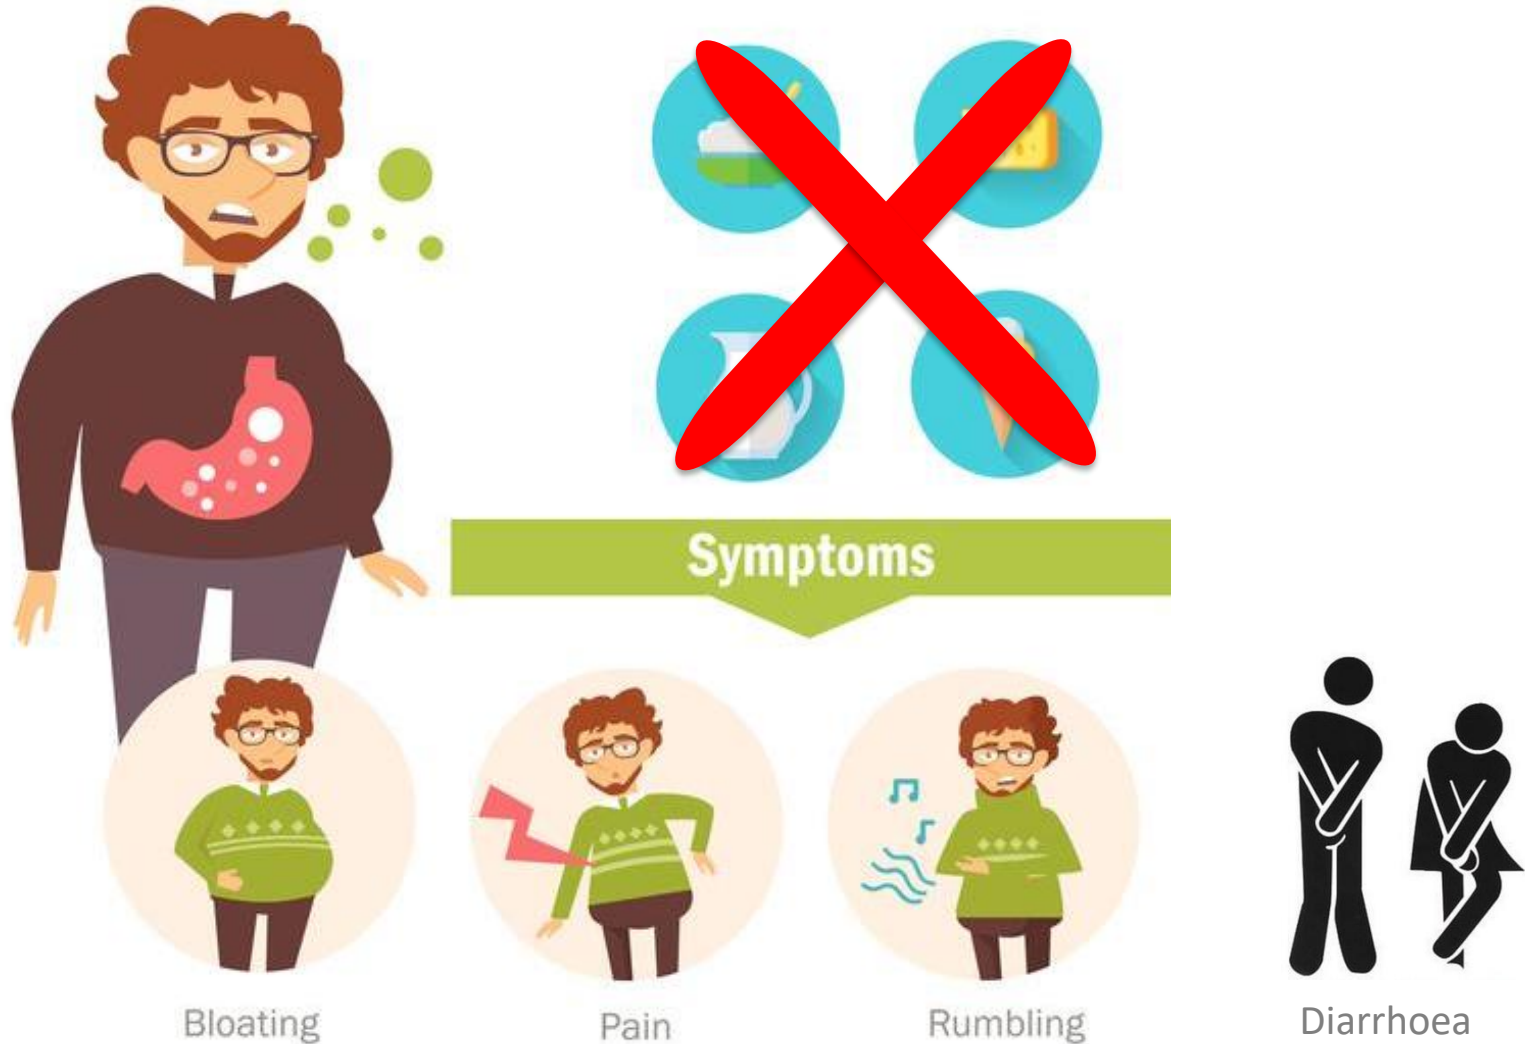

# Milk in Human Health



**Calcium**

**Vitamin A**

**Phosphorus**

**Riboflavin**

**Protein**

**Vitamin  
B12**

**Niacin**

**Fat**

**Vitamin D**



# Milk in Human Health

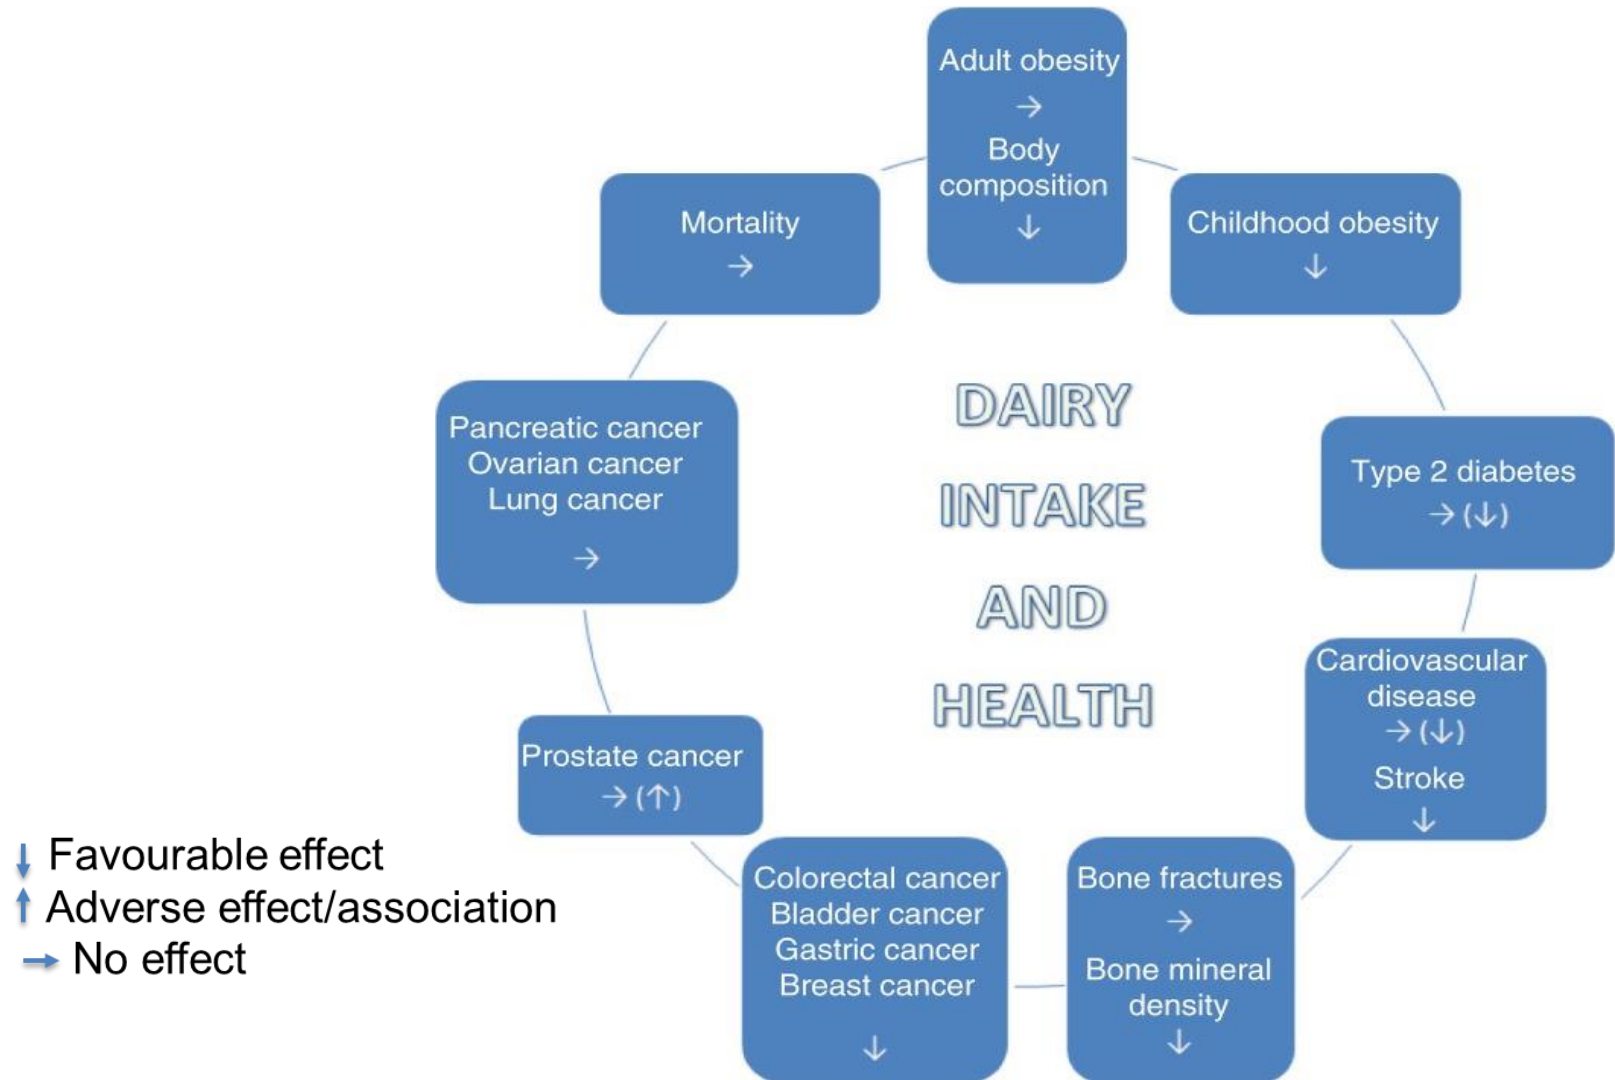

Thorning, Tanja Kongerslev et al. "Milk and Dairy Products: Good or Bad for Human Health? An Assessment of the Totality of Scientific Evidence." Food & Nutrition Research 60 (2016): 10.3402/fnr.v60.32527. PMC. Web. 18 Oct. 2017.

# Choices for Lactose Intolerants

- Lactose-free milk 🍌
- a2 Milk™ 🤔
- Conventional milk 🤔

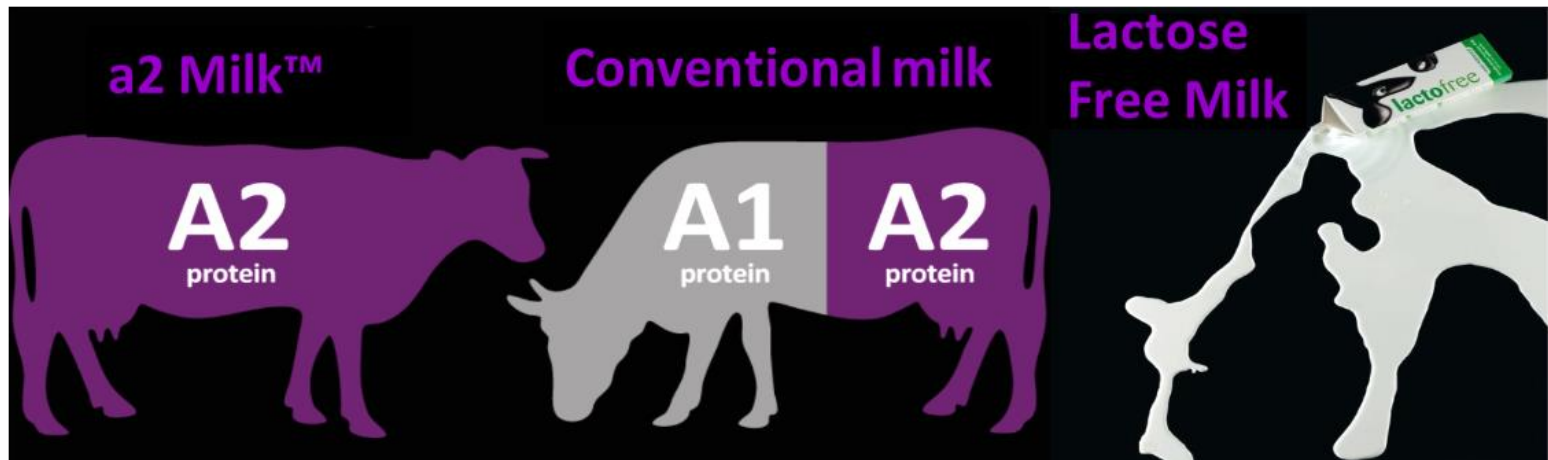

# What is known

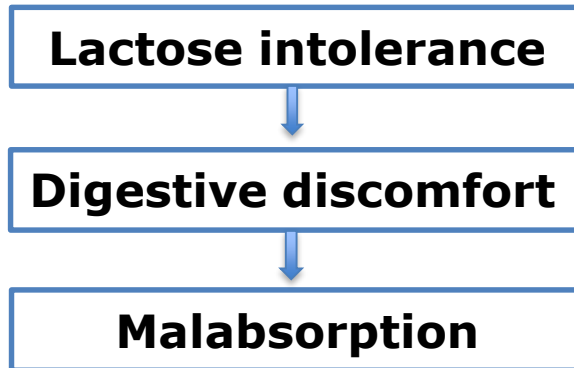

## Aims

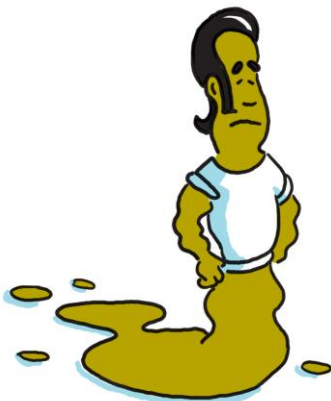

- Protein digestion ?
- Amino acid (AA) absorption ?
- Gastrointestinal transit ?



# Hypotheses

- Lactose-free milk will improve protein digestion and AA absorption in LI individuals compared to conventional milk and a2 Milk™
- a2 Milk™ may induce improvements in protein digestion and AA absorption in LI individuals relative to conventional milk

# Methods

## Screening

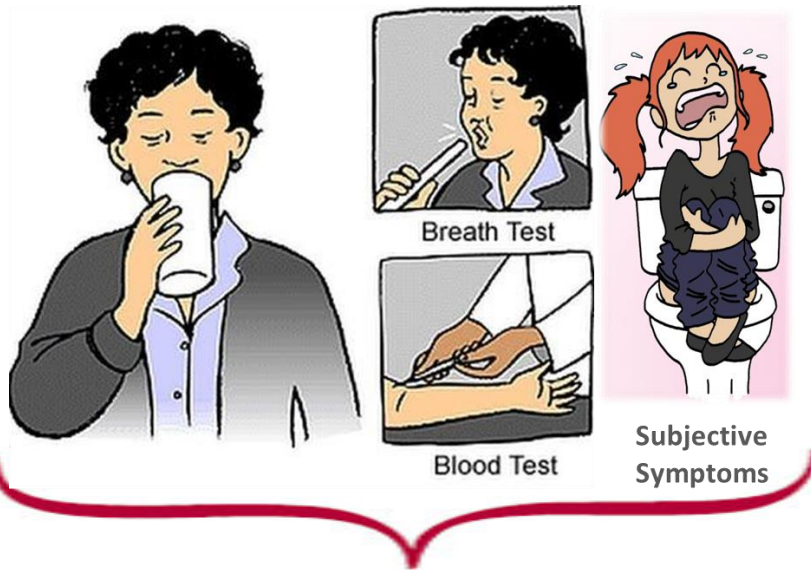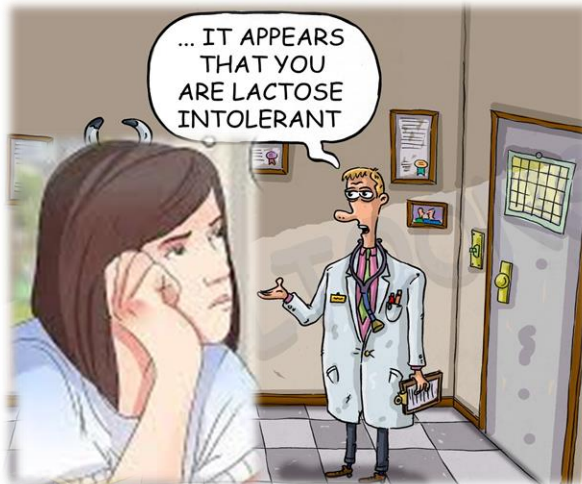

## Intervention

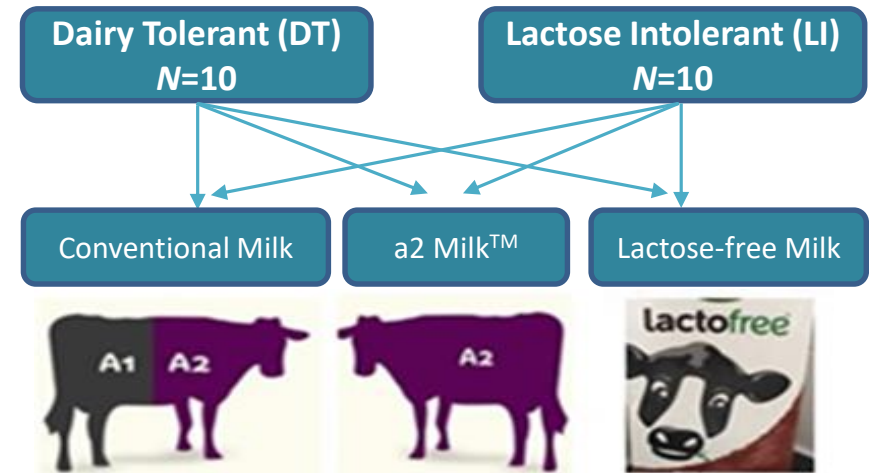

## Sample Collection & Analysis

- ✓ Fasting and postprandial blood samples were collected up to 3 hrs
- ✓ Blood glucose and insulin were measured by colorimetric assays
- ✓ Circulatory free AA was analysed by ultra-high pressure liquid chromatography (UPLC)

# Results

## Baseline subject characteristics

|                  | Dairy Tolerant | Lactose Intolerant |
|------------------|----------------|--------------------|
| N                | 10             | 10                 |
| Age (Years)      | 25 ± 1         | 27 ± 1             |
| BMI              | 24.5 ± 1.1     | 22.9 ± 0.9         |
| TG (mmol/l)      | 1.16 ± 0.15    | 1.17 ± 0.16        |
| Glucose (mmol/l) | 5.47 ± 0.14    | 5.48 ± 0.35        |
| Insulin (mU/l)   | 12.08 ± 2.10   | 10.89 ± 1.26       |
| HOMA-IR          | 2.91 ± 0.47    | 2.54 ± 0.35        |

Values represent means ± SEMs. BMI: body mass index; TG: triglyceride.

TG and glucose were measured from plasma whereas insulin was measured from serum.

- Response to all the milk types:

LI group had higher plasma concentrations of **glutamic acid** than DT group ( $p < 0.05$  each, respectively)

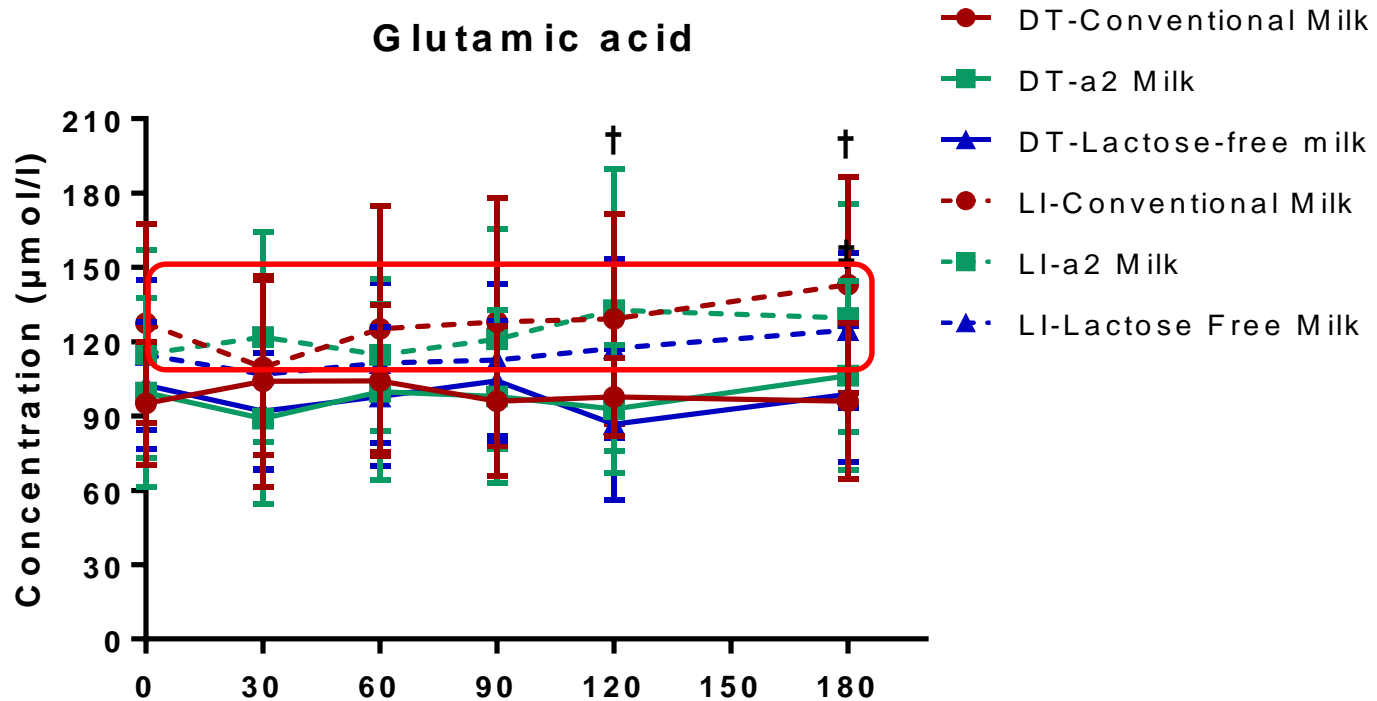

† Significantly different in response to conventional milk between the groups

- Response to a2 Milk™:

DT group had higher circulatory concentrations of **threonine** compared to LI group ( $p < 0.05$ )

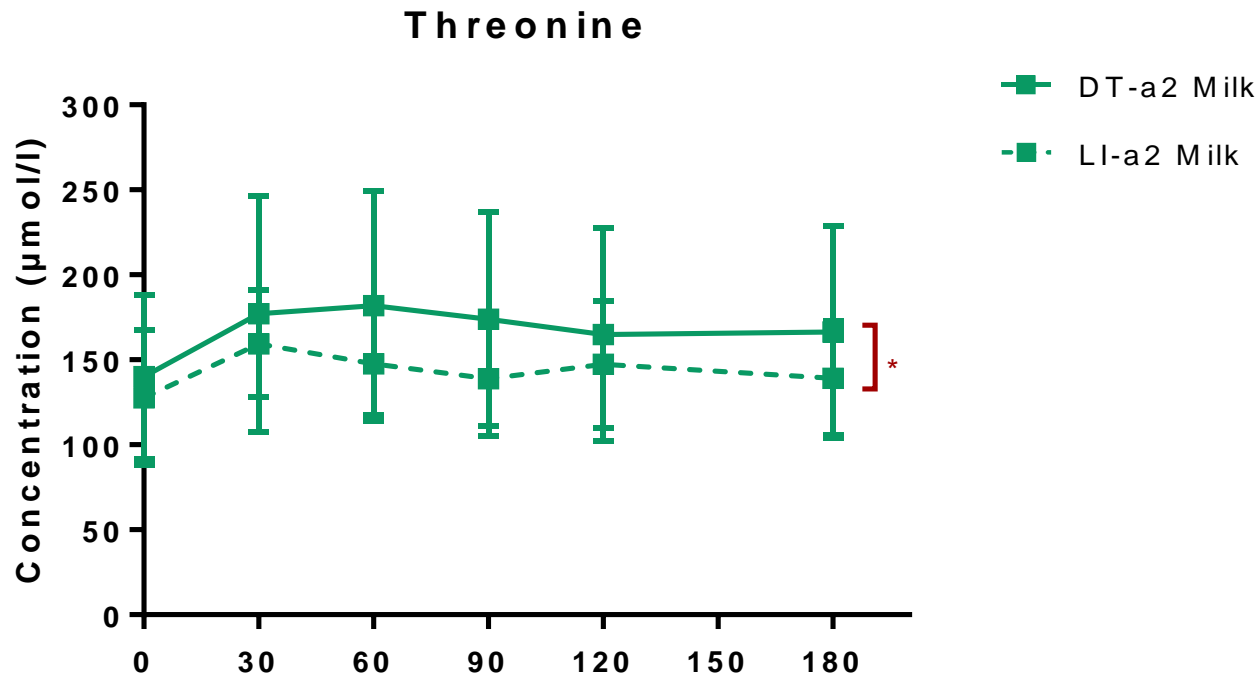

- Lactose-free milk > conventional milk:**

Both groups had higher plasma concentrations of **threonine**, **alanine** and **proline** ( $p < 0.05$  each, respectively)

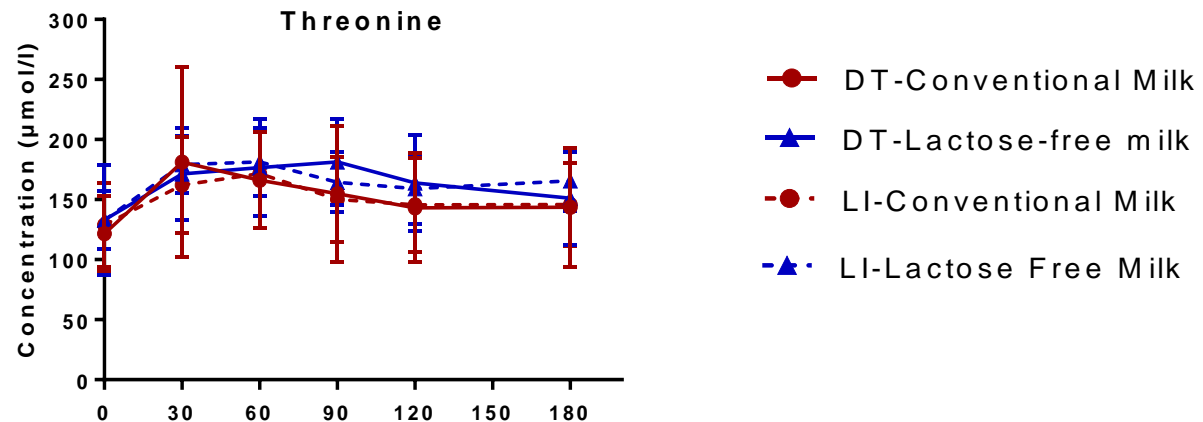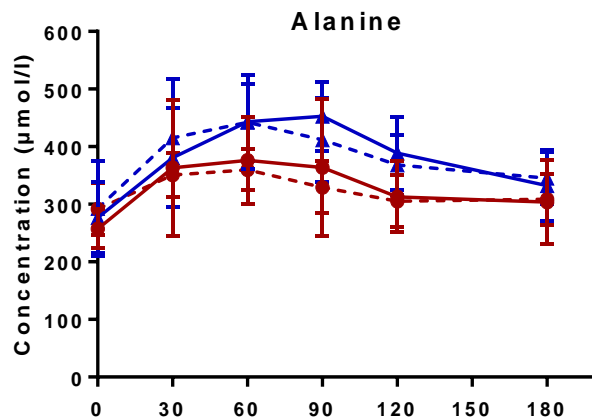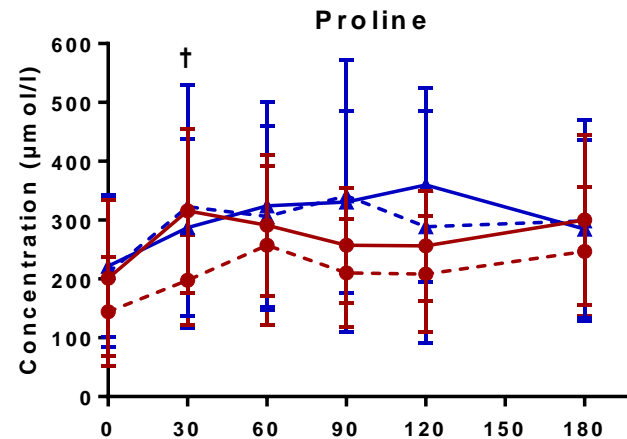

†Significantly different in response to conventional milk between the groups



- Lactose-free milk > a2 Milk™:

Both groups had higher plasma concentrations of **alanine** and **proline** ( $p < 0.05$  each, respectively)

- DT-a2 Milk
- DT-Lactose-free milk
- LI-a2 Milk
- LI-Lactose Free Milk

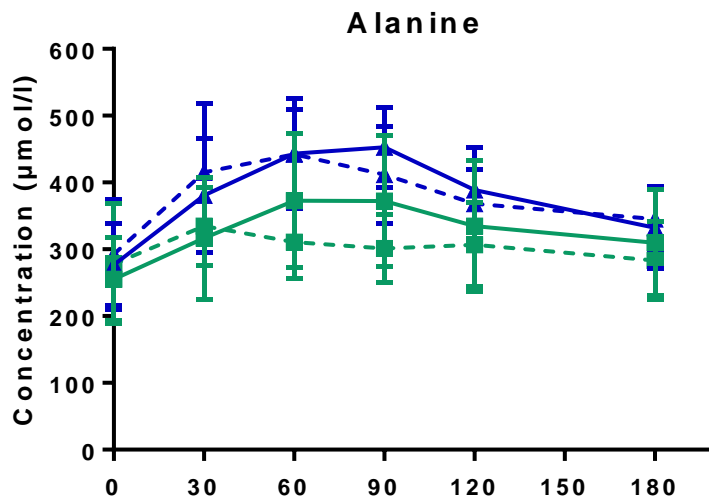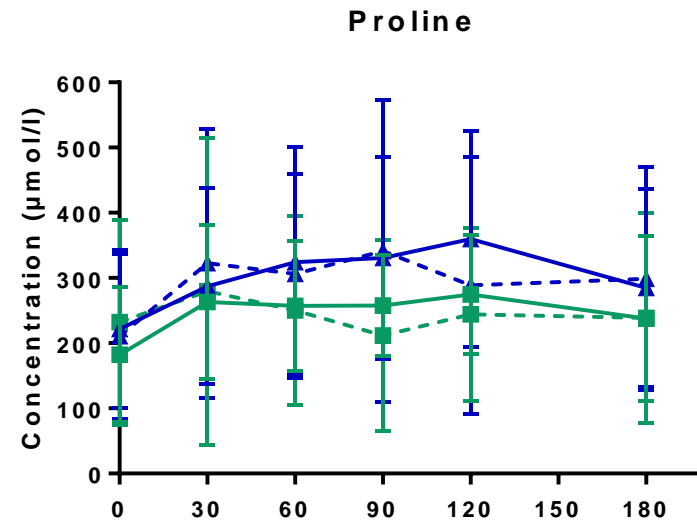

## • In Lactose Intolerant Group:

**Threonine-** Lactose-free milk > a2 Milk<sup>TM</sup> ( $p<0.05$ )

**Glutamic acid-** Conventional milk > Lactose-free milk ( $p<0.05$ )

**Alanine-** Lactose-free milk > Conventional milk > a2 Milk<sup>TM</sup> ( $p<0.05$ )

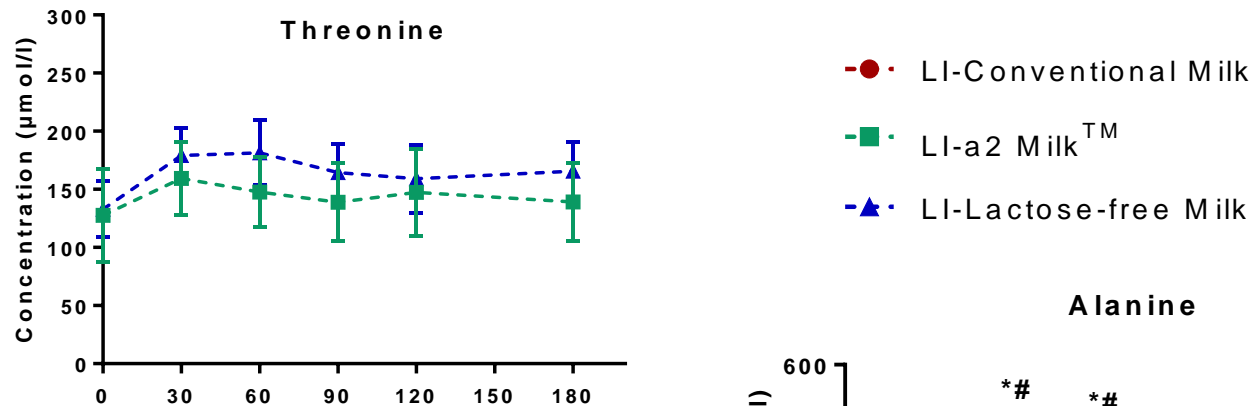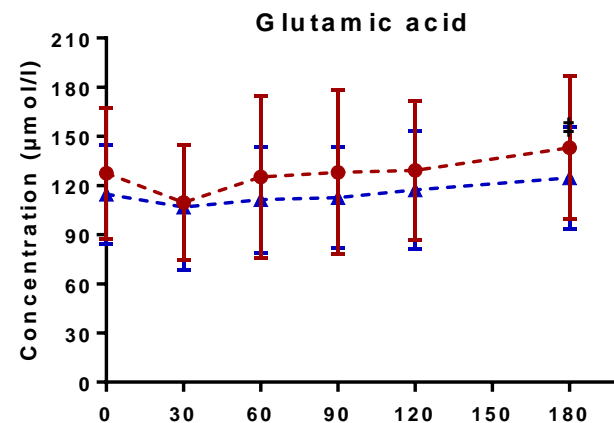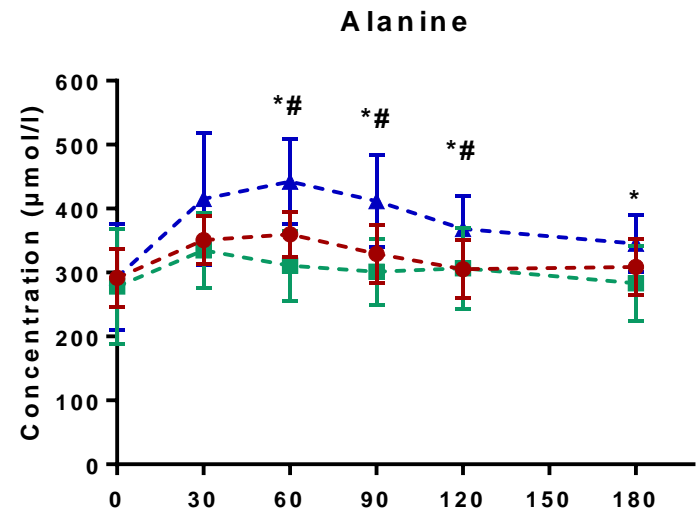

\*Significantly different between lactose-free milk and conventional milk

#Significantly different between lactose-free milk and a2 Milk<sup>TM</sup>

# Only Alanine AUC was significant !

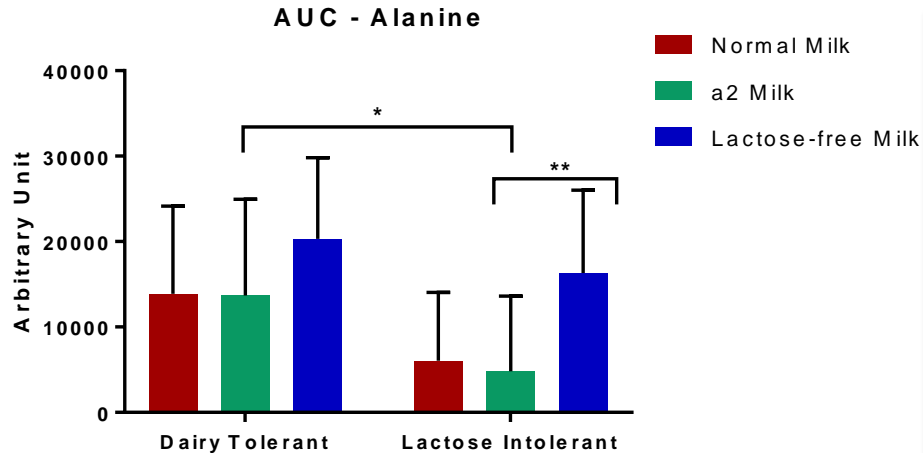

\*Significant difference in response to a2 Milk™ between the groups

\*\*Significant difference in LI group between lactose-free milk and a2 Milk™

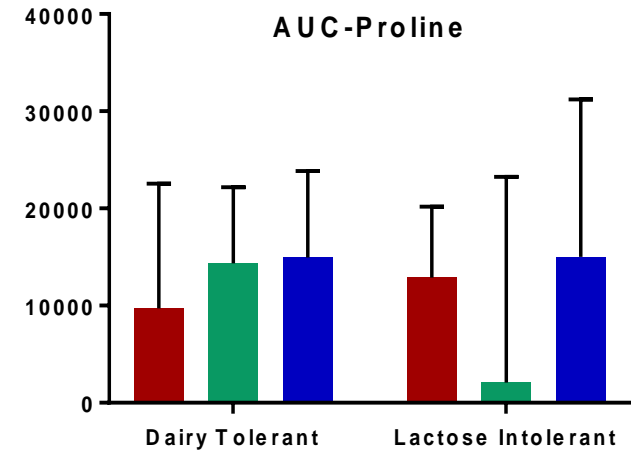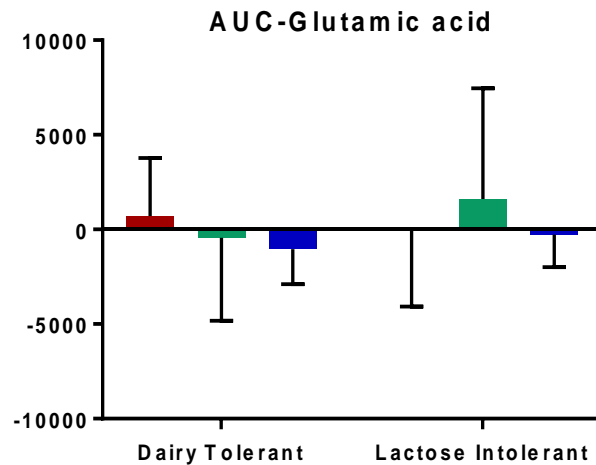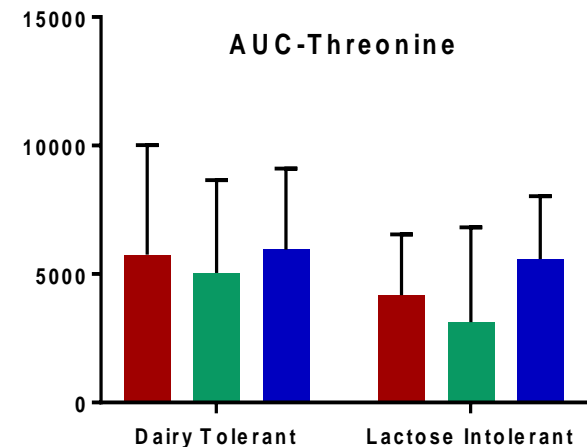

# None of the grouped AAs differed between or within the groups in response to milk types

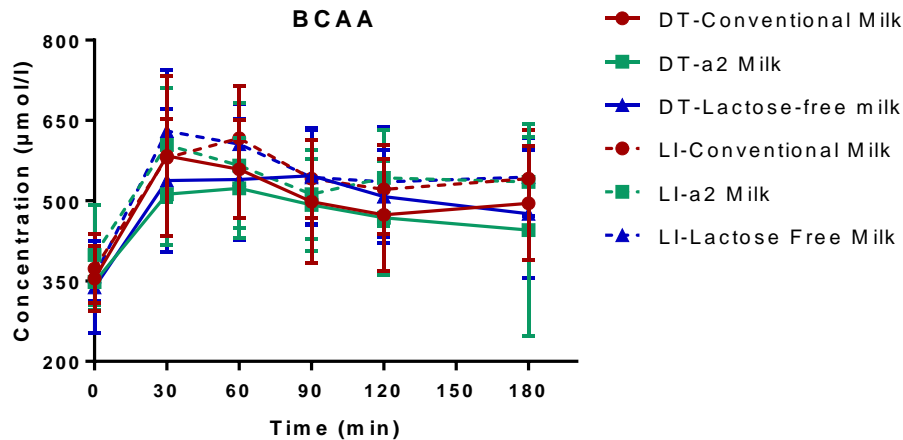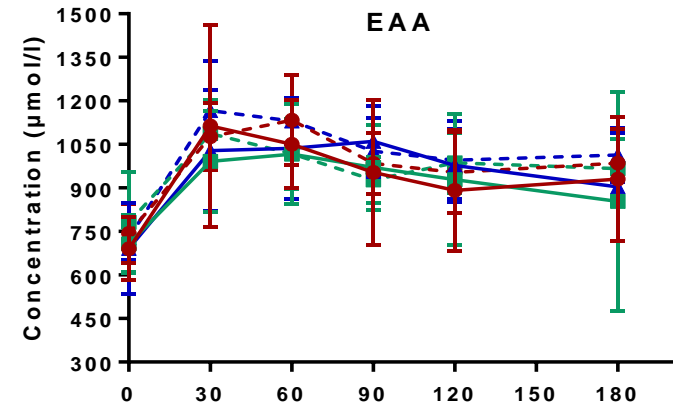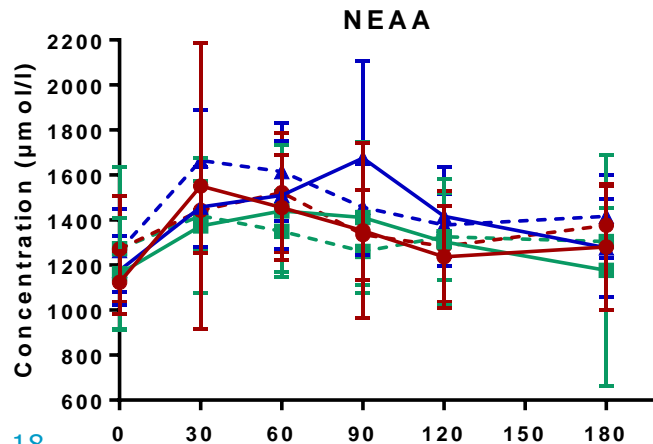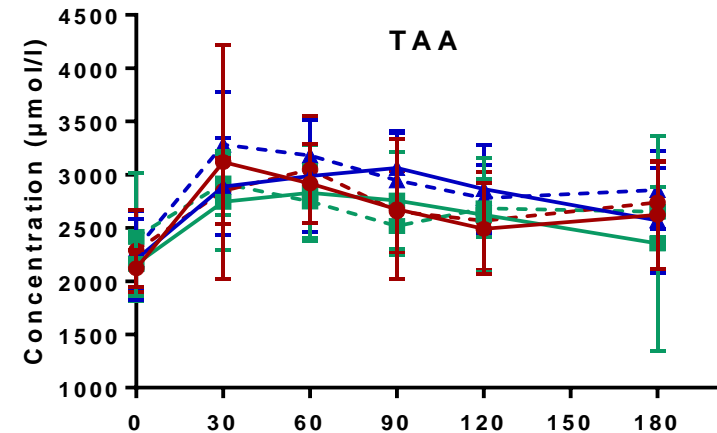

# AUC of the grouped AAs followed similar pattern in response to specific milk types

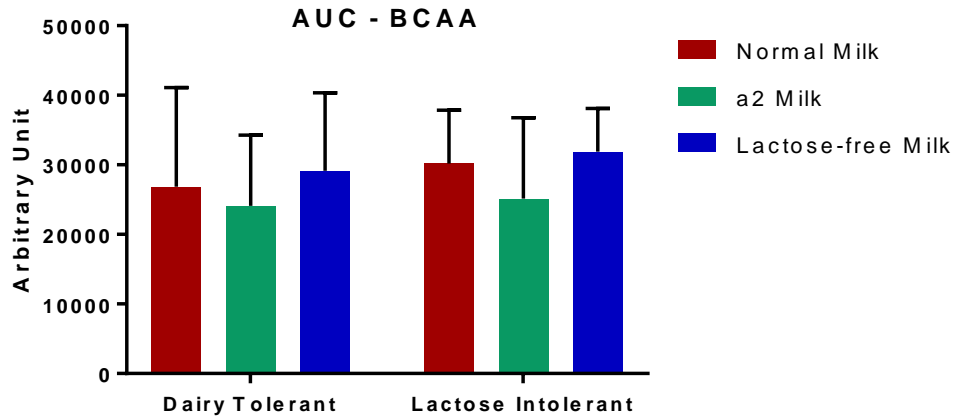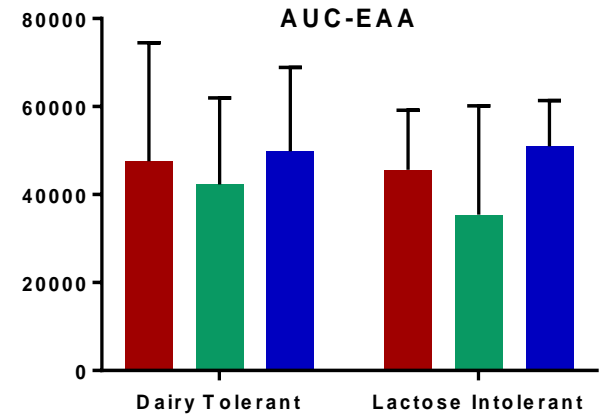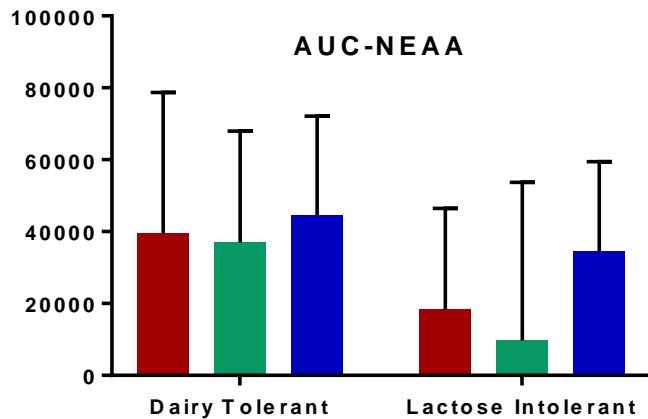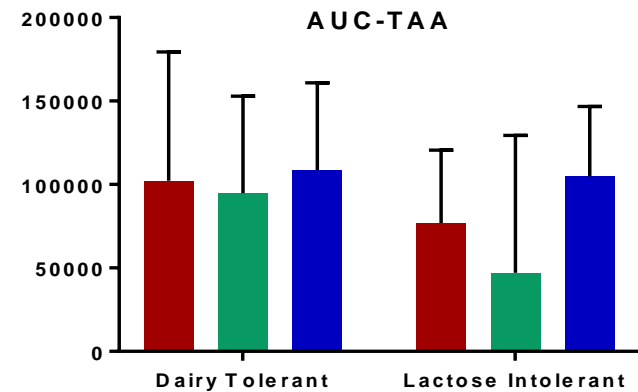

# Conclusions

- Lactose intolerance has little impact on postprandial plasma levels of specific AAs
- This response did not differ between conventional or a2 Milk™
- Lactose-free milk altered protein digestibility

## Future studies

- Impact of chronic exposure to  $\beta$ -casein variants in ameliorating lactose intolerance conditions
- Examine the differences in gastrointestinal transit time due to different milk ingestion



# Benefits outweigh the costs!!!

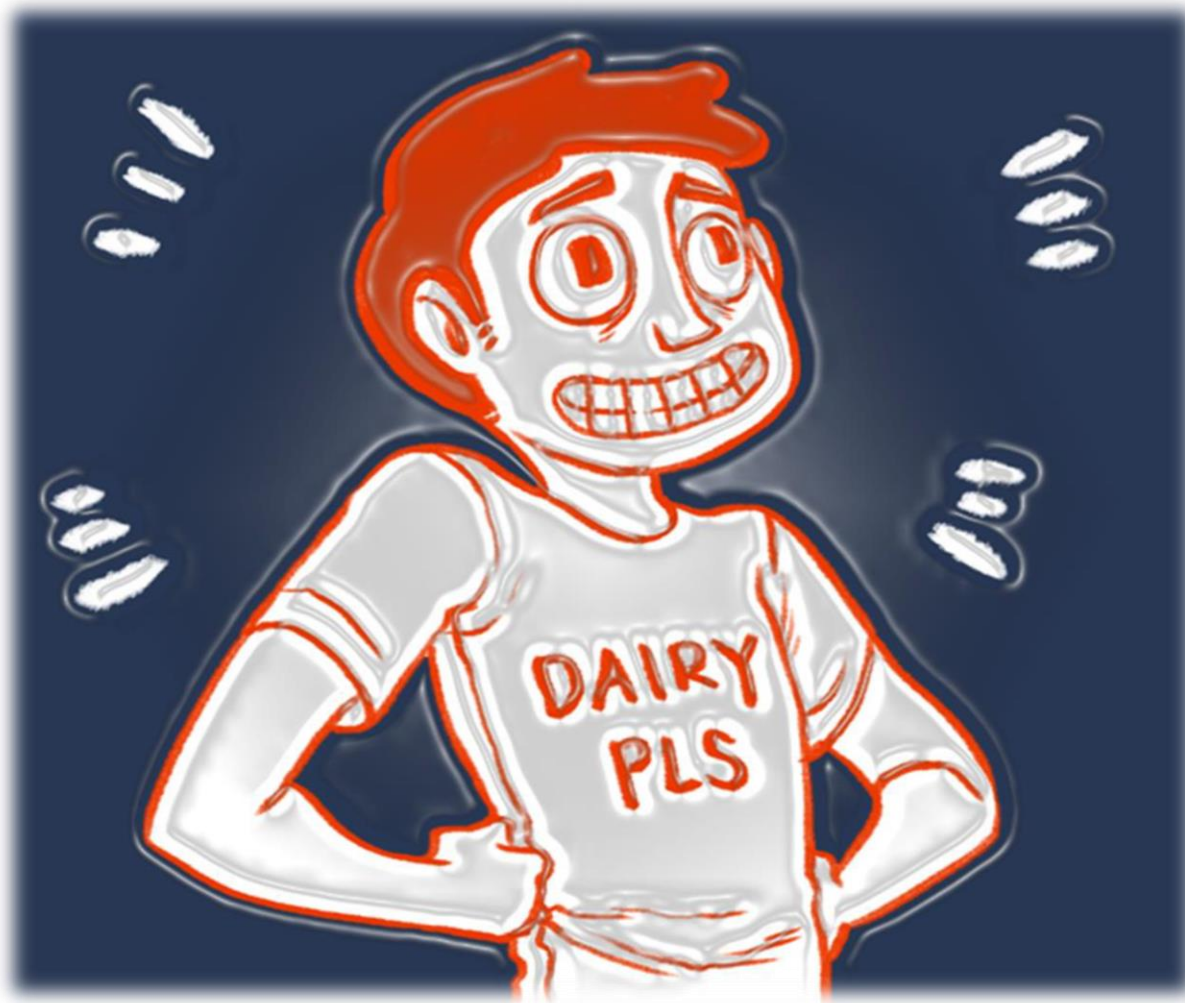

# Acknowledgement

Professor David Cameron-Smith

Dr Amber Milan

Dr Matthew Barnett

**DCS** Lab group

Eric Thorstensen

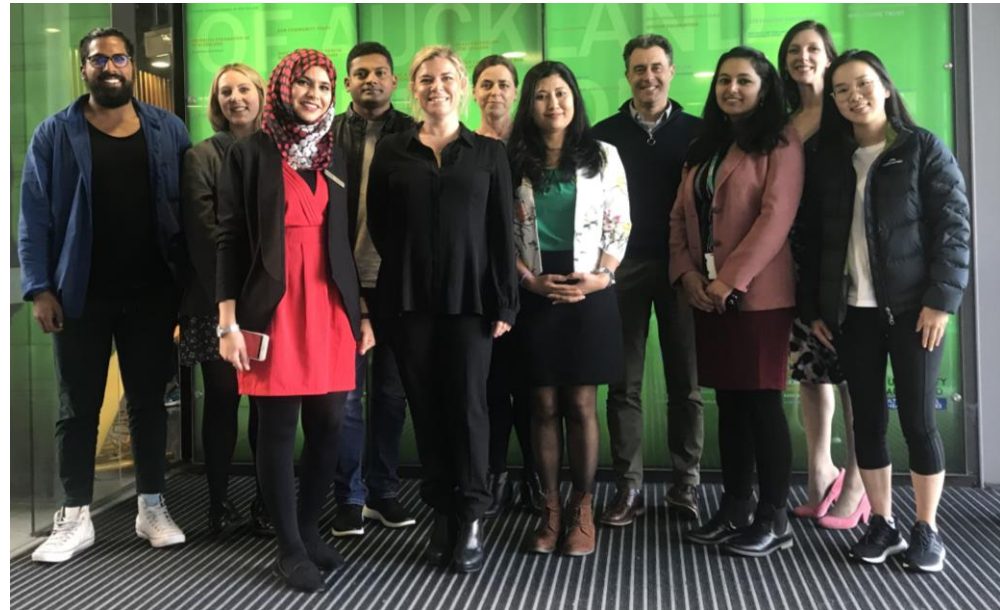

National  
**SCIENCE**  
Challenges

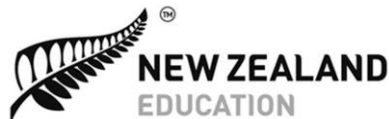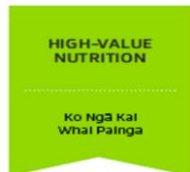

The  
**a2 Milk**  
Company™

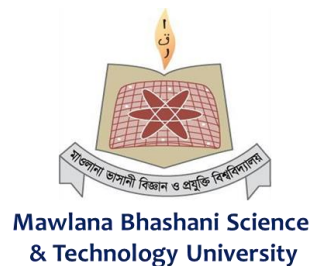

**agresearch**  
*āta mātai, mātai whetū*

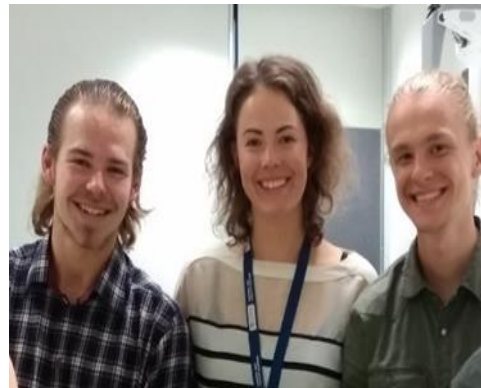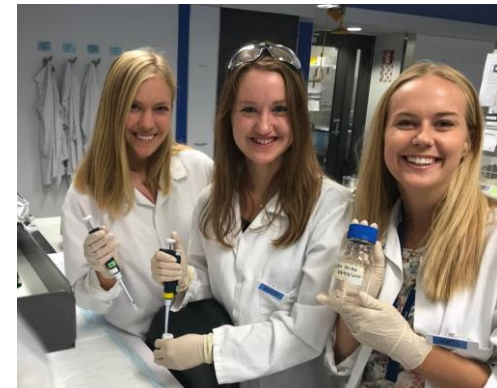

Supplement: s1 [file s1]
